# Supplementary material
Source: publisher figshare collection journal article supplement (https://acs.figshare.com/ndownloader/files/14517926)
Supplement: Supplementary file 1 [file 14517926]

Supporting information for:

# Effects of Composition and Sequence of Ethylene-Vinyl Acetate Copolymers on Their Alcoholysis and Oxygen Barrier Property of Alcoholized Copolymers

Xiaoxian Xue,<sup>†</sup> Li Tian,<sup>†</sup> Song Hong,<sup>‡</sup> Shu Zhang,<sup>\*,†</sup> and Yixian Wu<sup>\*,†</sup>

<sup>†</sup> State Key Laboratory of Chemical Resource Engineering, Beijing University of Chemical Technology, Beijing 100029, China

<sup>‡</sup> Center for Instrumental Analysis, Beijing University of Chemical Technology, Beijing, 100029, China

Corresponding author. Email: [wuyx@mail.buct.edu.cn](mailto:wuyx@mail.buct.edu.cn) (Y.X. Wu)

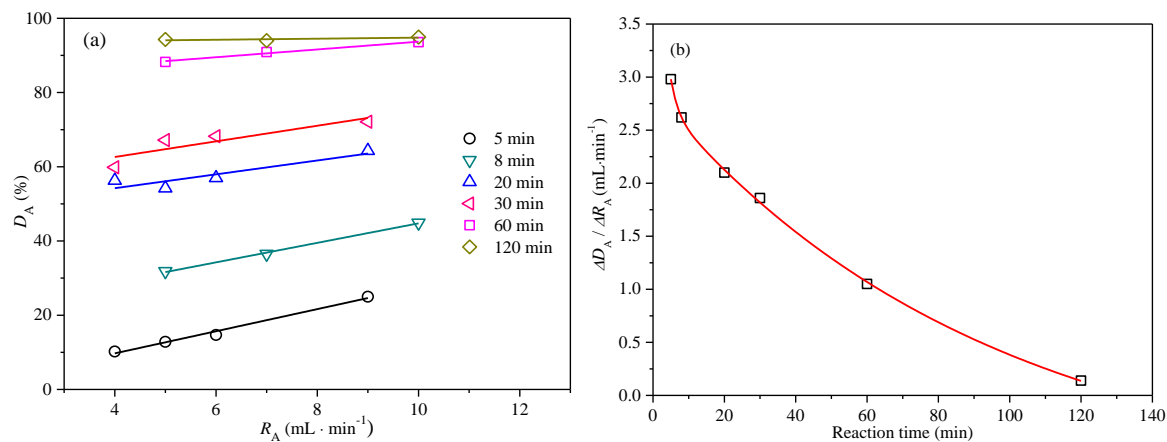

**Figure S1.** (a) Effect of removal rate ( $R_A$ ) of distilled methanol/methyl acetate mixture on  $D_A$  of alcoholized EVA copolymer (EVA-385); (b) Effect of reaction time on  $D_A/R_A$ . EVA-371:  $E =$

37.1 mol%,  $M_n = 18 \text{ kg}\cdot\text{mol}^{-1}$ , PDI = 2.7, concentration of EVA in methanol: 25 wt%,  $n_{\text{NaOCH}_3} = 0.05$ , reaction temperature: 65 °C.

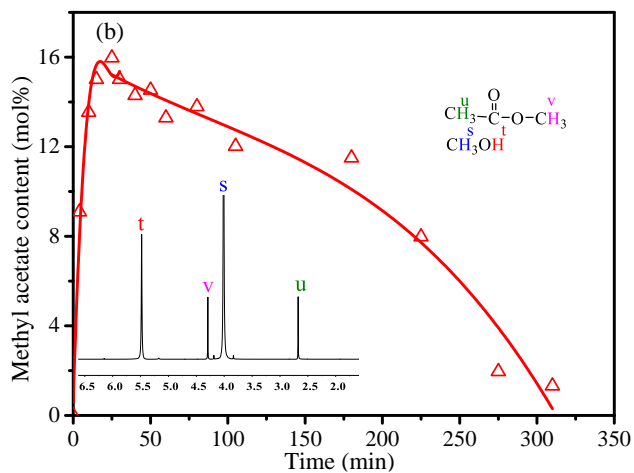

**Figure S2.** Dependence of methyl acetate content in the distilled mixtures on reaction time during alcoholysis of EVA-371. Representative  $^1\text{H}$  NMR spectrum of distilled mixture (methanol and methyl acetate) from the alcoholysis reaction was inserted into the figure. Reaction conditions were the same as those in [Figure S1](#).
